# Supplementary material for: Insights into Biochemical Sources and Diffuse Reflectance Spectral Features for Colorectal Cancer Detection and Localization
Source: MDPI journal article supplement (doi:10.3390/cancers14225715), 2022-11-21
Supplement: s1 [file s1]

## Supplementary Material

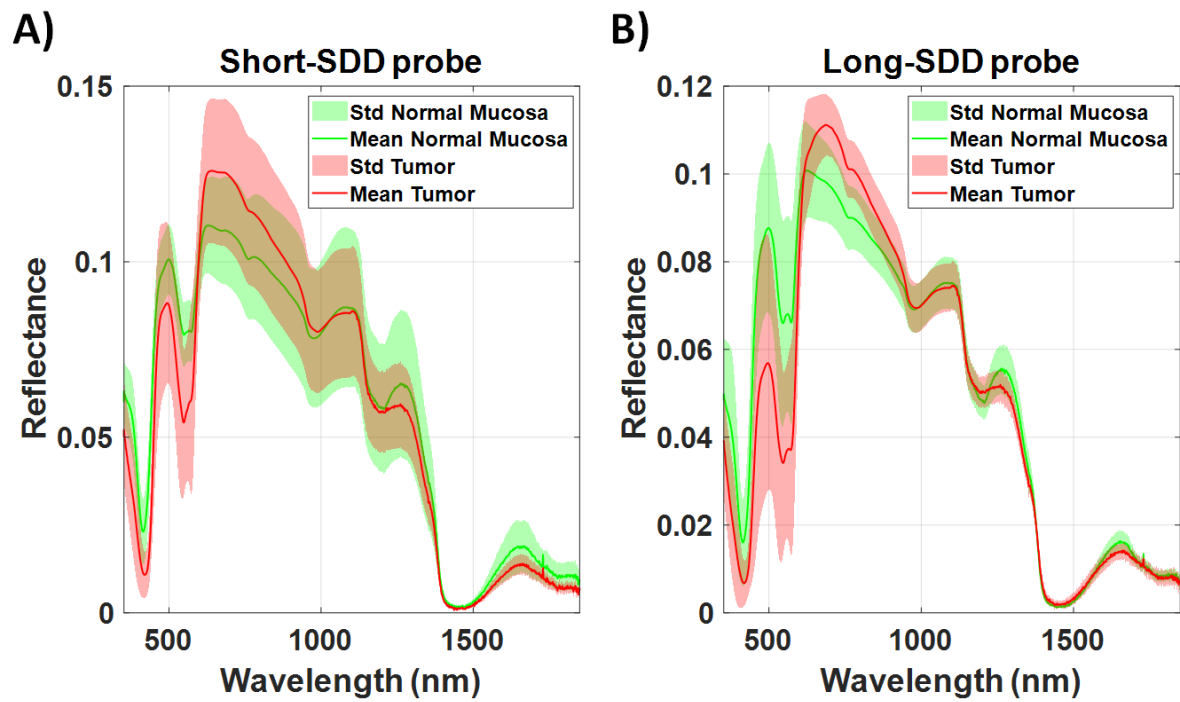

**Figure S1.** Mean and standard deviation across broadband reflectance spectra of all measured locations of both tumor and normal mucosa measured with (A) the short-SDD and (B) the long-SDD probe for one patient.
